# Supplementary material
Source: Springer Nature journal article supplement (https://www.springermedizin.de/resource/supplementary/13002_2007_149_MOESM2_ESM.pdf/9627260)

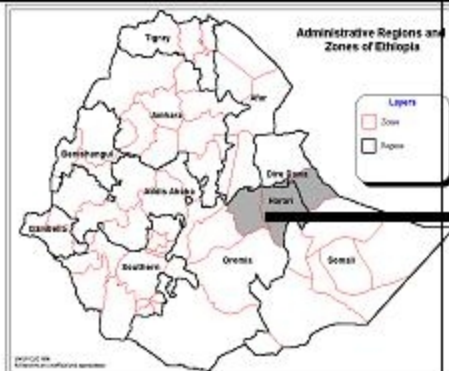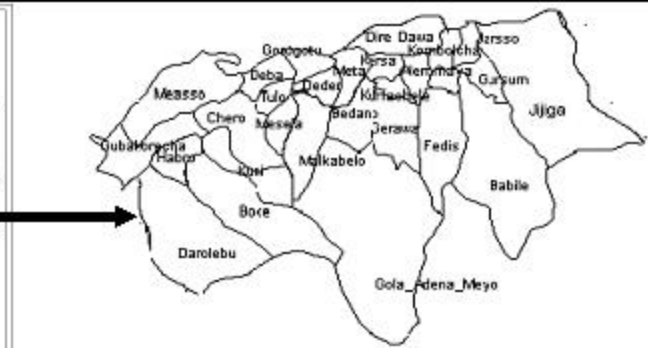

d

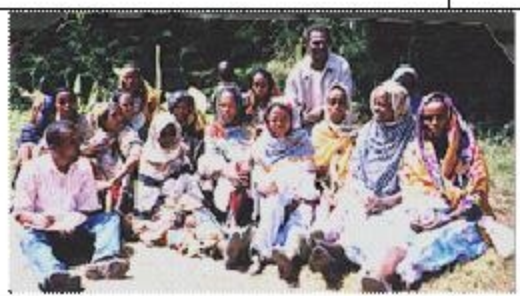

b

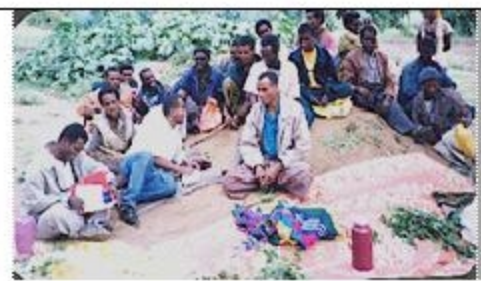

c

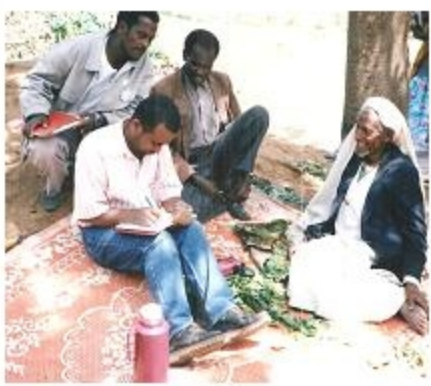

d

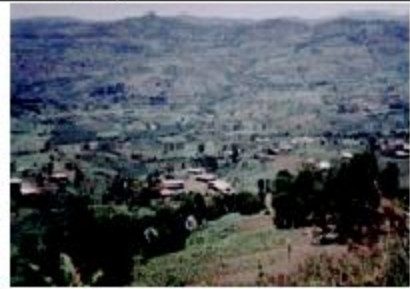

e

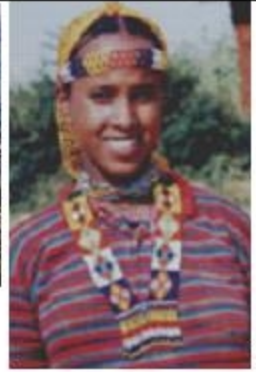

f

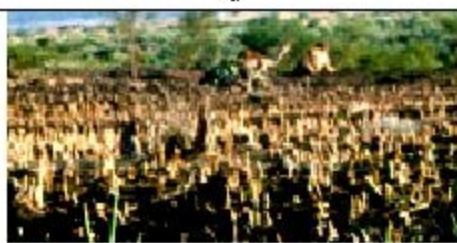

g

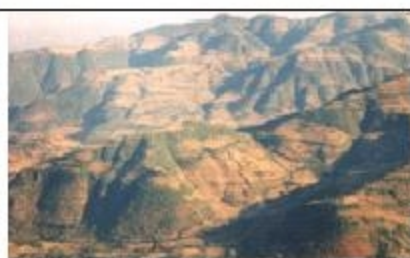

h

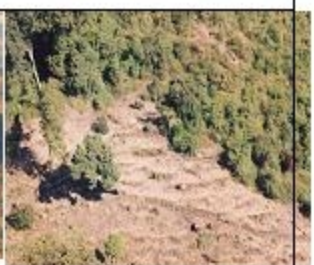

i

Supplement: MOESM2 [file 9627260]
